# Supplementary material
Source: PubMed Central journal article supplement (PMC2864352)
Supplement: NIHMS195894-supplement-1_si_001.pdf [file NIHMS195894-supplement-1_si_001.pdf]

## Supporting Information

# Cross-Link Structure Affects Replication-Independent DNA Interstrand Cross-Link Repair in Mammalian Cells<sup>†</sup>

*<sup>†</sup>This research was supported by grants from the National Cancer Institute (CA082785 and T32CA091110), the Natural Sciences and Engineering Research Council (NSERC) of Canada, the Canada Research Chair program, and the American Heart Association (103527).*

*Erica M. Hlavin, Michael B. Smeaton, Anne M. Noronha<sup>#</sup>, Christopher J. Wilds<sup>#</sup>,  
and Paul S. Miller<sup>\*</sup>*

Department of Biochemistry and Molecular Biology

Bloomberg School of Public Health

Johns Hopkins University

615 North Wolfe Street

Baltimore, MD 21205

USA

Running Title: Cross-link structure affects mammalian ICL repair

#Department of Chemistry and Biochemistry

Concordia University

Montreal, Quebec

Canada

\* Correspondence should be addressed to Paul S. Miller

E-mail: [pmiller@jhsph.edu](mailto:pmiller@jhsph.edu)

Phone: (410)-955-3489

Fax: (410)-955-2926

## **Supplementary Methods**

*siRNA knockdowns of Rev1.* To ensure efficient siRNA delivery, reverse transfections were performed with 20pmol Rev1 siRNA with Lipofectamine 2000 (Invitrogen) in  $13 \times 10^4$  HeLa cells in a 24-well plate. Serum-free media containing the DNA/liposome complex was replaced after 6 h with serum-containing medium. Cells were lysed 48 h after transfection and probed for Rev1 using an anti-human Rev1 antibody (Santa Cruz). Tubulin was used as a loading control. Host-cell reactivation repair assays were performed as previously noted in the Methods section between 24 and 48 h after transfection with Rev1 siRNA.

Figure S1

Nondamaged control  
5' - CAACTTGCTC  
3' - TTTTGTTGAAC

C-C ICL  
5' - CAACCTTGCTC  
3' - TTTTGTTCAAC

T-T ICL  
5' - CAATTTGCTC  
3' - TTTTGTTTAAC

I-T ICL  
5' - CAATTTGCTC  
3' - TTTTGTTIAAC

-CG- ICL  
5' - GAACCGTTCCCTC  
3' - TTTTCTTGCAAG

C-C t.s.  
5' - AGTGCCTACTC  
3' - TTTTTCACGGAT

C-C non t.s.  
5' - AGTGGCTACTC  
3' - TTTTTCACCGAT

T-T t.s.  
5' - CAGTGTCTACCCTC  
3' - TTTTGTCACAGATGG

T-T non t.s.  
5' - CAGTGACTACCCTC  
3' - TTTTGTCACTGATGG

Figure S1: Sequences of non-damaged, cross-linked, and cross-link remnant containing duplexes used to construct the reporter plasmids. Cross-linked nucleotides are indicated by the bold underline. Transcribed strand and non-transcribed strands are indicated by "t.s." and "non t.s.," respectively.

Figure S2

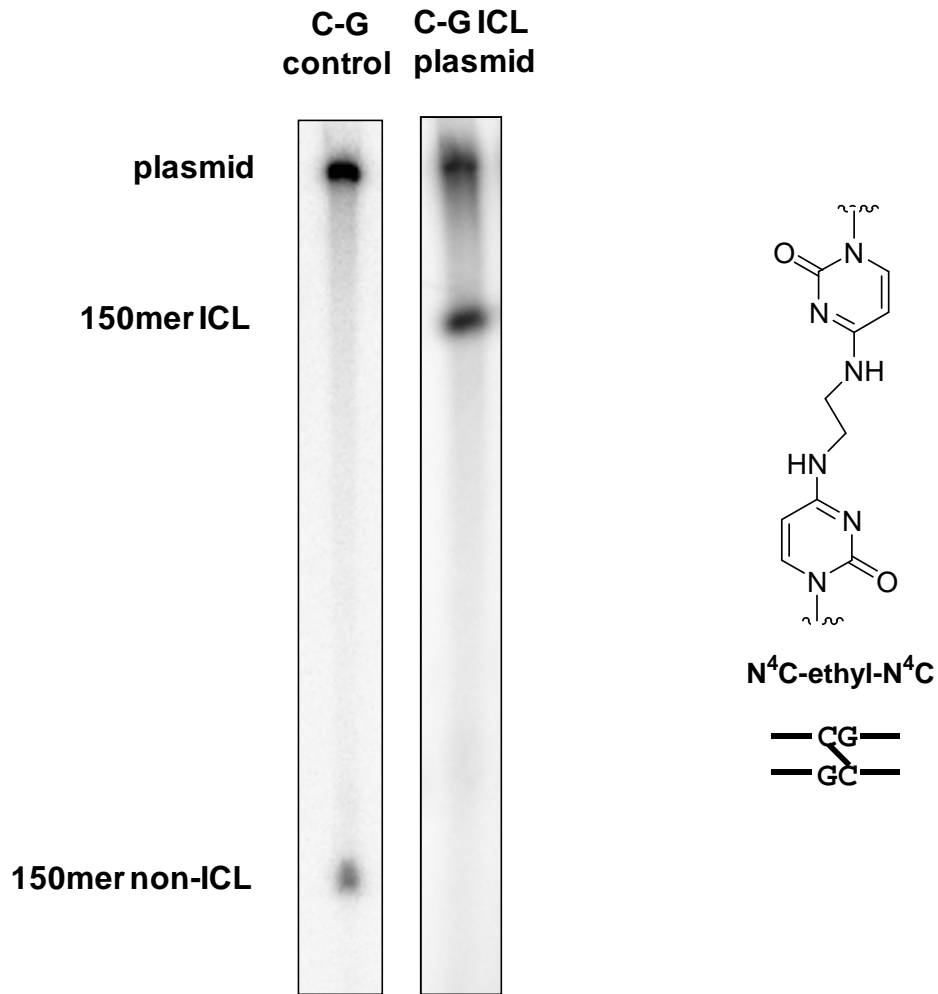

Figure S2: Structure of a N<sup>4</sup>C-ethyl-N<sup>4</sup>C interstrand cross-link placed in a -CG- sequence and characterization of a -CG- cross-linked plasmid. The non-damaged control plasmid or the -CG- cross-linked plasmid was digested with a restriction enzyme to release a 150bp fragment; the fragment was radiolabeled using the Klenow fragment of *E. Coli* DNA polymerase I, and the products were analyzed on a 6% denaturing gel.

Figure S3

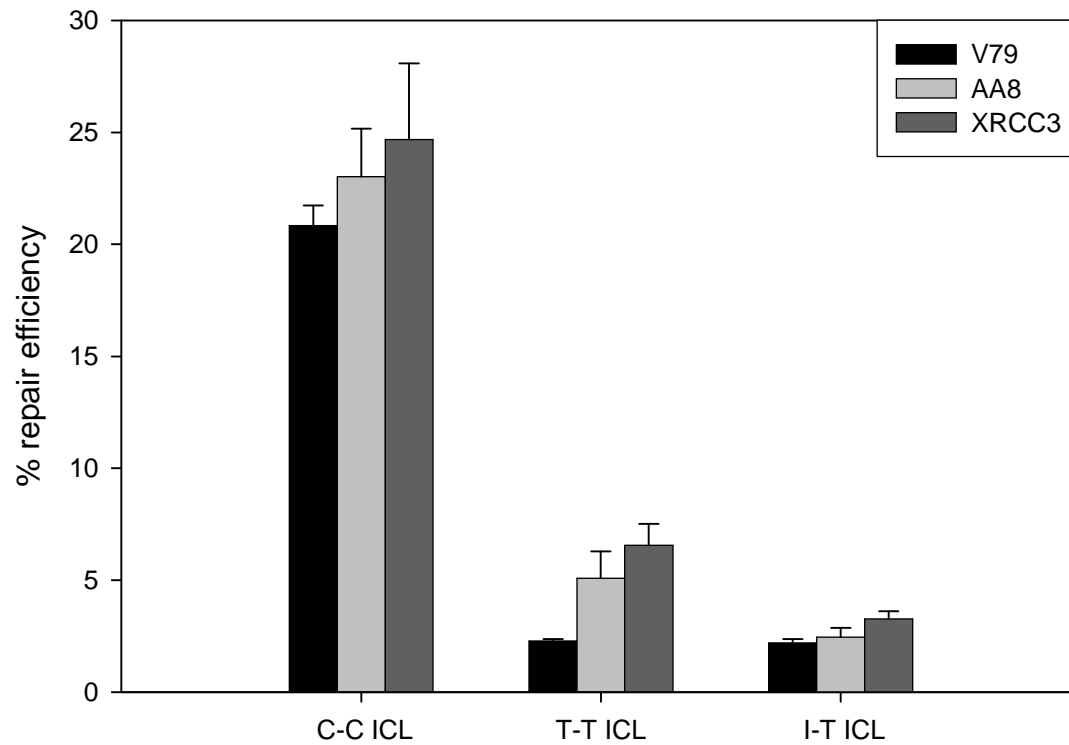

Figure S3: Repair efficiencies of C-C, T-T and I-T interstrand cross-linked plasmids transfected into wild-type CHO (AA8 or V79) and XRCC3-deficient cells derived from the V79 cell line. Percent repair efficiency is the relative level of luciferase expression from a damaged plasmid compared to that from a non-damaged control plasmid. Six replicates were performed and the error bars represent the standard error for each data point.

Figure S4

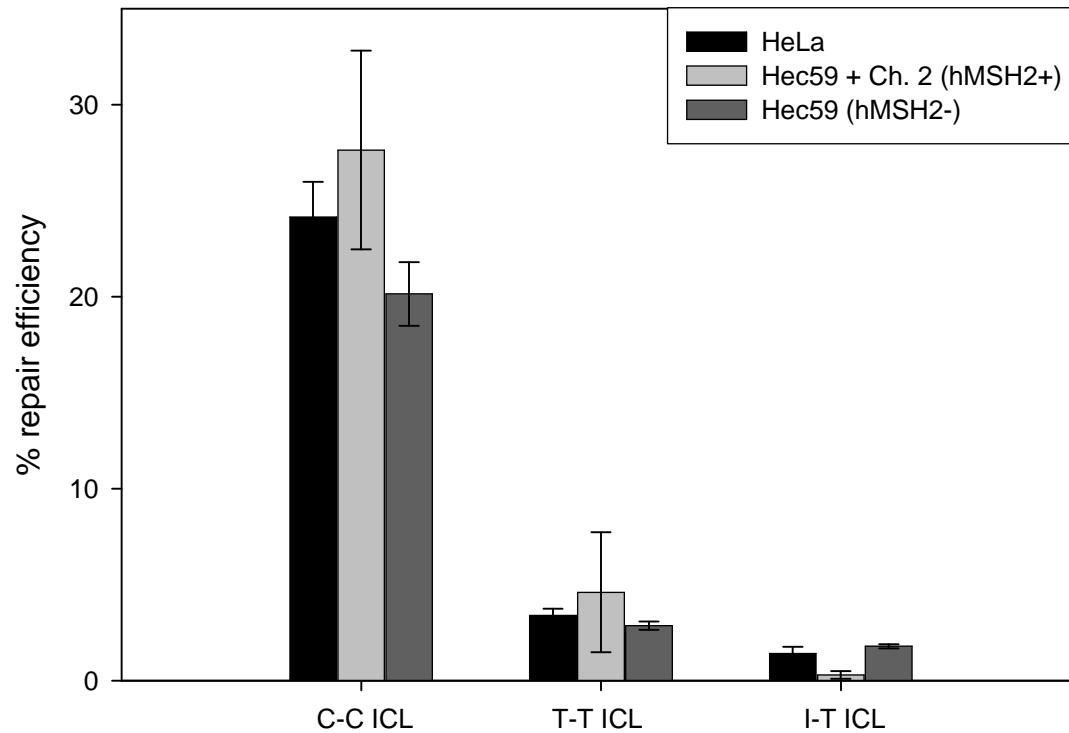

Figure S4: Repair efficiencies of C-C, T-T and I-T interstrand cross-linked plasmids transfected into wild-type HeLa cells, hMSH2-deficient (Hec59) cells, and Hec59 cells complemented with chromosome 2 (hMSH2+). Percent repair efficiency is the relative level of luciferase expression from a damaged plasmid compared to that from a non-damaged control plasmid. Six replicates were performed and the error bars represent the standard error for each data point.

Figure S5

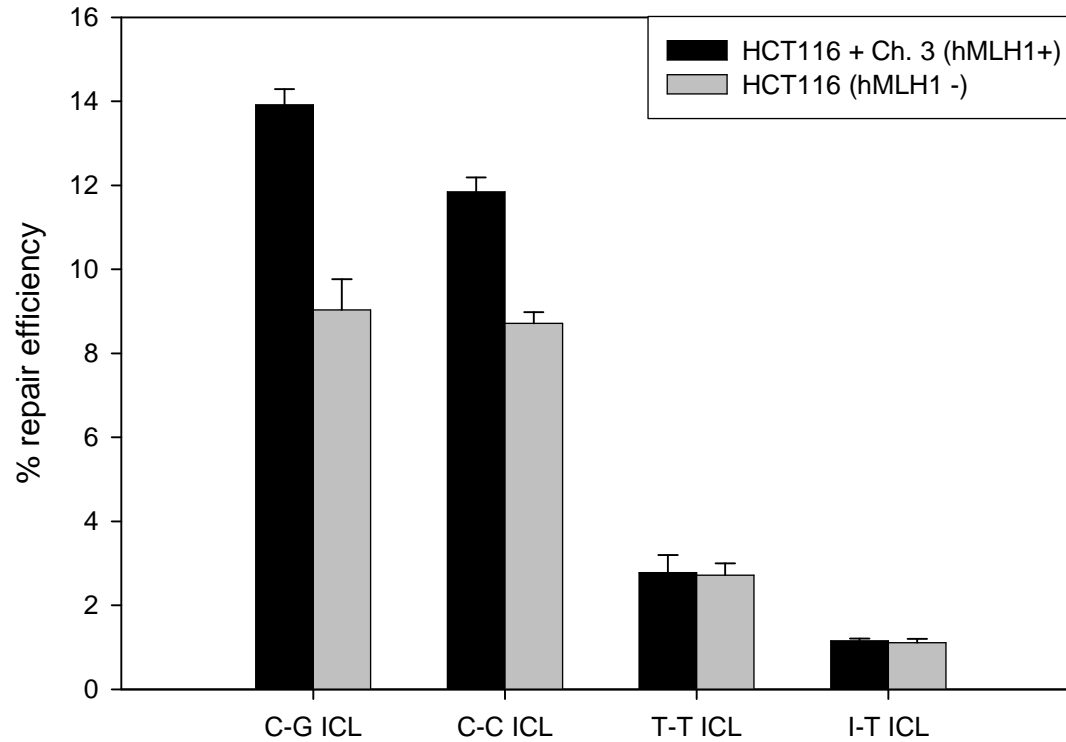

Figure S5: Repair efficiencies of -CG-, C-C, T-T and I-T interstrand cross-linked plasmids transfected into the hMLH1-deficient cell line HCT116 (hMLH-) and the parental cell line, HCT116 complemented with chromosome 3 (hMLH1+). Percent repair efficiency is the relative level of luciferase expression from a damaged plasmid compared to that from a non-damaged control plasmid. Six replicates were performed and the error bars represent the standard error for each data point.



Figure S6

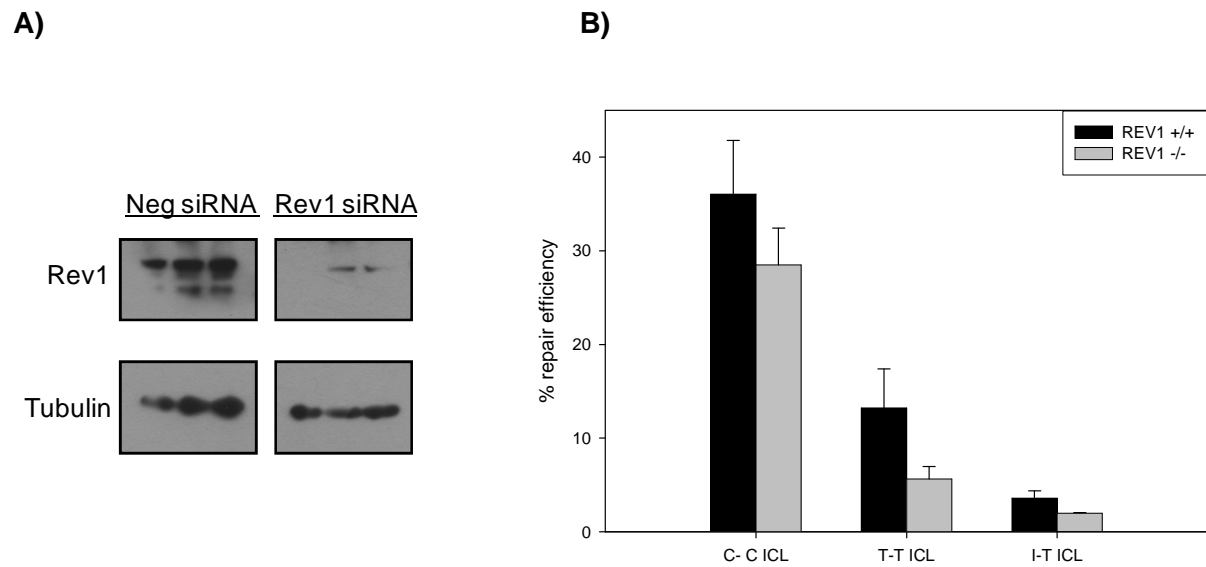

Figure S6: A) Rev1 siRNA knockdown in HeLa cells. Three independent experiments are shown simultaneously for each blot. A human anti-Rev1 antibody was used to determine protein expression of Rev1 and an anti-Tubulin antibody was used for the loading control. B) Repair efficiencies of C-C, T-T, and I-T interstrand cross-linked plasmids transfected into wild-type DT40 (REV1+/+) and REV1-/- DT40 cells. Percent repair efficiency is the relative level of luciferase expression from a damaged plasmid compared to that from a non-damaged control plasmid. Six replicates were performed and the error bars represent the standard error for each data point.
